# Supplementary material for: Detection of grey zones in inter-rater agreement studies
Source: Springer Nature journal article supplement (doi:10.1186/s12874-022-01759-7), 2023-01-05
Supplement: MOESM1 [file 23892940]

# Electronic Supplementary Material for 'Detection of Grey Zones in Inter-rater Agreement Studies'

Haydar Demirhan and Ezgi Yilmaz  
haydar.demirhan@rmit.edu.au;  
ezgiyilmaz@hacettepe.edu.tr

**Table S1** Descriptive statistics of  $\kappa$  and  $\Delta$  calculated for  $(\rho, n)$  pairs.

| $\rho$ | $n$  | $\kappa$ |       |       | $\Delta$ |        |         |         |         |
|--------|------|----------|-------|-------|----------|--------|---------|---------|---------|
|        |      | Min      | Med   | Max   | Min      | Med    | 90th    | 95th    | Max     |
| 0.45   | 50   | -0.125   | 0.209 | 0.539 | 3.861    | 27.308 | 291.607 | 291.607 | 312.726 |
| 0.45   | 100  | -0.002   | 0.213 | 0.442 | 4.564    | 16.053 | 246.335 | 413.388 | 413.388 |
| 0.45   | 200  | 0.049    | 0.210 | 0.388 | 5.339    | 12.830 | 55.564  | 55.564  | 247.037 |
| 0.45   | 300  | 0.053    | 0.209 | 0.364 | 5.279    | 12.167 | 17.114  | 17.114  | 268.517 |
| 0.45   | 400  | 0.085    | 0.206 | 0.322 | 6.526    | 11.972 | 33.634  | 33.634  | 51.478  |
| 0.45   | 500  | 0.100    | 0.207 | 0.308 | 6.157    | 11.508 | 15.630  | 15.863  | 35.401  |
| 0.45   | 1000 | 0.134    | 0.209 | 0.297 | 6.790    | 10.907 | 14.185  | 14.185  | 25.180  |
| 0.50   | 50   | -0.163   | 0.230 | 0.601 | 2.939    | 21.067 | 223.222 | 223.222 | 424.269 |
| 0.50   | 100  | 0.008    | 0.231 | 0.444 | 4.585    | 13.777 | 376.726 | 376.726 | 376.726 |
| 0.50   | 200  | 0.026    | 0.236 | 0.397 | 5.169    | 11.030 | 24.614  | 24.614  | 332.055 |
| 0.50   | 300  | 0.100    | 0.235 | 0.360 | 5.464    | 10.433 | 25.308  | 25.308  | 35.637  |
| 0.50   | 400  | 0.122    | 0.238 | 0.353 | 5.404    | 9.846  | 13.630  | 13.630  | 31.639  |
| 0.50   | 500  | 0.113    | 0.236 | 0.346 | 5.715    | 9.912  | 12.526  | 12.526  | 27.523  |
| 0.50   | 1000 | 0.168    | 0.236 | 0.302 | 6.050    | 9.497  | 12.310  | 12.310  | 18.969  |
| 0.55   | 50   | -0.113   | 0.253 | 0.630 | 2.761    | 16.248 | 197.758 | 240.713 | 265.199 |
| 0.55   | 100  | 0.053    | 0.263 | 0.497 | 3.998    | 10.750 | 158.032 | 158.032 | 249.900 |
| 0.55   | 200  | 0.108    | 0.268 | 0.439 | 4.456    | 9.208  | 17.471  | 17.471  | 51.593  |
| 0.55   | 300  | 0.151    | 0.266 | 0.394 | 5.157    | 8.907  | 14.197  | 14.197  | 27.817  |
| 0.55   | 400  | 0.154    | 0.268 | 0.390 | 4.720    | 8.766  | 10.255  | 10.255  | 20.651  |
| 0.55   | 500  | 0.169    | 0.267 | 0.367 | 4.794    | 8.488  | 8.778   | 8.778   | 20.789  |
| 0.55   | 1000 | 0.184    | 0.268 | 0.346 | 5.434    | 8.300  | 11.714  | 11.714  | 15.273  |
| 0.60   | 50   | -0.065   | 0.298 | 0.569 | 3.437    | 11.366 | 154.520 | 154.520 | 280.281 |
| 0.60   | 100  | 0.068    | 0.292 | 0.525 | 3.792    | 9.013  | 43.027  | 104.885 | 181.672 |
| 0.60   | 200  | 0.144    | 0.299 | 0.466 | 4.170    | 7.994  | 13.187  | 13.187  | 22.728  |
| 0.60   | 300  | 0.147    | 0.302 | 0.471 | 4.167    | 7.658  | 8.497   | 8.497   | 20.729  |
| 0.60   | 400  | 0.162    | 0.298 | 0.443 | 4.475    | 7.640  | 12.981  | 12.981  | 18.195  |
| 0.60   | 500  | 0.192    | 0.300 | 0.407 | 4.682    | 7.573  | 10.468  | 10.468  | 15.085  |
| 0.60   | 1000 | 0.208    | 0.300 | 0.380 | 4.603    | 7.492  | 9.072   | 9.072   | 15.480  |
| 0.65   | 50   | -0.028   | 0.332 | 0.635 | 2.543    | 9.014  | 197.864 | 197.864 | 425.251 |
| 0.65   | 100  | 0.082    | 0.331 | 0.591 | 3.702    | 7.416  | 16.878  | 16.878  | 146.471 |
| 0.65   | 200  | 0.120    | 0.332 | 0.496 | 3.988    | 6.979  | 7.376   | 13.104  | 28.008  |
| 0.65   | 300  | 0.203    | 0.335 | 0.479 | 4.037    | 6.827  | 7.443   | 7.443   | 14.356  |
| 0.65   | 400  | 0.205    | 0.335 | 0.476 | 4.061    | 6.751  | 8.806   | 8.806   | 13.703  |
| 0.65   | 500  | 0.225    | 0.335 | 0.441 | 4.008    | 6.678  | 7.735   | 7.735   | 15.502  |
| 0.65   | 1000 | 0.249    | 0.339 | 0.430 | 4.675    | 6.596  | 8.962   | 8.962   | 12.296  |
| 0.70   | 50   | 0.054    | 0.365 | 0.660 | 2.541    | 7.249  | 39.341  | 39.341  | 592.563 |
| 0.70   | 100  | 0.142    | 0.371 | 0.621 | 2.852    | 6.363  | 10.605  | 14.711  | 46.144  |
| 0.70   | 200  | 0.234    | 0.375 | 0.538 | 3.580    | 6.061  | 7.004   | 7.004   | 12.723  |
| 0.70   | 300  | 0.240    | 0.375 | 0.506 | 3.647    | 5.990  | 7.405   | 7.405   | 12.772  |
| 0.70   | 400  | 0.275    | 0.374 | 0.503 | 3.711    | 5.969  | 6.721   | 6.721   | 11.023  |
| 0.70   | 500  | 0.269    | 0.378 | 0.492 | 3.918    | 5.899  | 8.601   | 8.601   | 11.609  |
| 0.70   | 1000 | 0.298    | 0.374 | 0.452 | 3.752    | 5.800  | 7.963   | 7.963   | 10.539  |
| 0.75   | 50   | 0.012    | 0.419 | 0.728 | 1.485    | 5.976  | 38.841  | 38.841  | 146.074 |
| 0.75   | 100  | 0.157    | 0.418 | 0.635 | 2.288    | 5.438  | 6.938   | 6.938   | 29.757  |
| 0.75   | 200  | 0.232    | 0.418 | 0.586 | 3.173    | 5.267  | 6.729   | 6.729   | 11.456  |
| 0.75   | 300  | 0.268    | 0.420 | 0.548 | 3.358    | 5.153  | 5.788   | 5.788   | 11.947  |
| 0.75   | 400  | 0.286    | 0.421 | 0.547 | 3.379    | 5.226  | 5.501   | 7.067   | 9.048   |
| 0.75   | 500  | 0.313    | 0.418 | 0.552 | 3.347    | 5.227  | 7.050   | 7.050   | 9.328   |
| 0.75   | 1000 | 0.336    | 0.421 | 0.485 | 3.679    | 5.133  | 5.747   | 5.747   | 9.200   |
| 0.80   | 50   | 0.102    | 0.459 | 0.784 | 1.670    | 4.950  | 8.300   | 21.983  | 393.512 |
| 0.80   | 100  | 0.253    | 0.471 | 0.771 | 1.456    | 4.690  | 5.238   | 5.298   | 12.260  |
| 0.80   | 200  | 0.316    | 0.466 | 0.609 | 2.823    | 4.504  | 4.887   | 4.887   | 9.829   |
| 0.80   | 300  | 0.355    | 0.470 | 0.593 | 3.020    | 4.512  | 4.996   | 4.996   | 10.480  |
| 0.80   | 400  | 0.364    | 0.473 | 0.589 | 3.154    | 4.497  | 4.594   | 5.392   | 8.911   |
| 0.80   | 500  | 0.372    | 0.472 | 0.591 | 3.068    | 4.562  | 5.247   | 5.643   | 7.844   |
| 0.80   | 1000 | 0.399    | 0.473 | 0.551 | 3.170    | 4.619  | 4.660   | 4.660   | 8.635   |
| 0.85   | 50   | 0.074    | 0.531 | 0.816 | 1.516    | 3.872  | 6.317   | 6.317   | 808.094 |
| 0.85   | 100  | 0.332    | 0.532 | 0.771 | 1.385    | 3.878  | 4.630   | 4.630   | 8.992   |
| 0.85   | 200  | 0.387    | 0.532 | 0.722 | 2.327    | 3.839  | 4.600   | 4.600   | 7.864   |
| 0.85   | 300  | 0.396    | 0.534 | 0.664 | 2.524    | 3.926  | 4.948   | 4.948   | 6.930   |
| 0.85   | 400  | 0.400    | 0.534 | 0.646 | 2.405    | 3.914  | 4.234   | 4.234   | 7.408   |
| 0.85   | 500  | 0.432    | 0.535 | 0.635 | 2.814    | 3.893  | 4.041   | 4.041   | 6.056   |
| 0.85   | 1000 | 0.467    | 0.534 | 0.604 | 2.787    | 4.008  | 3.836   | 3.913   | 6.486   |
| 0.90   | 50   | 0.242    | 0.605 | 0.876 | 1.336    | 3.153  | 4.274   | 4.274   | 59.505  |
| 0.90   | 100  | 0.410    | 0.607 | 0.831 | 1.593    | 3.203  | 4.349   | 4.349   | 7.542   |
| 0.90   | 200  | 0.470    | 0.608 | 0.742 | 1.955    | 3.274  | 4.076   | 4.076   | 6.601   |
| 0.90   | 300  | 0.498    | 0.614 | 0.733 | 2.088    | 3.280  | 3.293   | 3.293   | 6.022   |
| 0.90   | 400  | 0.524    | 0.612 | 0.705 | 2.150    | 3.273  | 4.288   | 4.288   | 5.839   |
| 0.90   | 500  | 0.504    | 0.614 | 0.701 | 2.105    | 3.281  | 5.081   | 5.081   | 6.507   |
| 0.90   | 1000 | 0.541    | 0.613 | 0.676 | 2.410    | 3.321  | 3.775   | 3.775   | 5.933   |

**Table S2** Sample size, correlation coefficient, true kappa, counts of true and false classifications, accuracy measures, cell probabilities used to inject grey zone and the corresponding kappa after injecting a grey zone in the table for 3x3 agreement tables.

| Case                        | n     | rho   | True kappa | Cell probabilities to create GZ |          |          |          |             |             |        |               |               |               |               |               | Corresponding Kappa under GZ |        |               |          |       |
|-----------------------------|-------|-------|------------|---------------------------------|----------|----------|----------|-------------|-------------|--------|---------------|---------------|---------------|---------------|---------------|------------------------------|--------|---------------|----------|-------|
|                             |       |       |            | GZ+ TGZ+                        | GZ- TGZ+ | GZ+ TGZ- | GZ- TGZ- | Sensitivity | Specificity | MCC    | (1,1)         | (1,2)         | (1,3)         | (2,1)         | (2,2)         |                              | (2,3)  | (3,1)         | (3,2)    | (3,3) |
| Cell (1,2)<br>creates<br>GZ | 50    | 0.960 | 0.639      | 9126                            | 874      | 385      | 9615     | 0.913       | 0.962       | 0.875  | 0.1901        | <b>0.2502</b> | 0.0001        | 0.0031        | 0.2501        | 0.0051                       | 0.0001 | 0.0001        | 0.3001   | 0.626 |
|                             | 50    | 0.980 | 0.756      | 7352                            | 2648     | 58       | 9942     | 0.735       | 0.994       | 0.755  | 0.2451        | <b>0.1862</b> | 0.0001        | 0.0001        | 0.2581        | 0.0001                       | 0.0001 | 0.0001        | 0.3101   | 0.727 |
|                             | 50    | 0.986 | 0.817      | 4017                            | 5983     | 80       | 9920     | 0.402       | 0.992       | 0.488  | 0.1600        | <b>0.1400</b> | 0.0001        | 0.0001        | 0.3500        | 0.0001                       | 0.0001 | 0.0001        | 0.3495   | 0.786 |
|                             | 100   | 0.930 | 0.639      | 9906                            | 94       | 168      | 9832     | 0.991       | 0.983       | 0.974  | 0.2361        | <b>0.1702</b> | 0.0001        | 0.0031        | 0.2051        | 0.0051                       | 0.0001 | 0.0801        | 0.3001   | 0.625 |
|                             | 100   | 0.965 | 0.744      | 8432                            | 1568     | 98       | 9902     | 0.843       | 0.990       | 0.843  | 0.2961        | <b>0.1102</b> | 0.0001        | 0.0031        | 0.2051        | 0.0051                       | 0.0001 | 0.0501        | 0.3301   | 0.749 |
|                             | 100   | 0.985 | 0.835      | 9338                            | 662      | 749      | 9251     | 0.934       | 0.925       | 0.859  | 0.2961        | <b>0.1102</b> | 0.0001        | 0.0001        | 0.2131        | 0.0001                       | 0.0001 | 0.0010        | 0.3801   | 0.834 |
|                             | 250   | 0.925 | 0.633      | 10000                           | 0        | 777      | 9223     | 1.000       | 0.922       | 0.925  | 0.2091        | <b>0.1971</b> | 0.0001        | 0.0081        | 0.2361        | 0.0201                       | 0.0001 | 0.0261        | 0.3041   | 0.632 |
|                             | 250   | 0.963 | 0.753      | 9973                            | 27       | 2141     | 7859     | 0.997       | 0.786       | 0.801  | 0.2091        | <b>0.1101</b> | 0.0001        | 0.0081        | 0.3231        | 0.0201                       | 0.0001 | 0.0261        | 0.3041   | 0.753 |
|                             | 250   | 0.977 | 0.838      | 10000                           | 0        | 3288     | 6712     | 1.000       | 0.671       | 0.711  | 0.2091        | <b>0.1101</b> | 0.0001        | 0.0001        | 0.3511        | 0.0001                       | 0.0001 | 0.0001        | 0.3301   | 0.834 |
|                             | 500   | 0.910 | 0.630      | 10000                           | 0        | 846      | 9154     | 1.000       | 0.915       | 0.919  | 0.2434        | <b>0.1468</b> | 0.0001        | 0.0021        | 0.1941        | 0.0361                       | 0.0041 | 0.0401        | 0.3141   | 0.631 |
|                             | 500   | 0.960 | 0.754      | 10000                           | 0        | 733      | 9267     | 1.000       | 0.927       | 0.929  | 0.2634        | <b>0.1268</b> | 0.0001        | 0.0021        | 0.2341        | 0.0161                       | 0.0041 | 0.0201        | 0.3341   | 0.750 |
|                             | 500   | 0.984 | 0.838      | 10000                           | 0        | 2225     | 7775     | 1.000       | 0.778       | 0.797  | 0.2794        | <b>0.1108</b> | 0.0001        | 0.0021        | 0.2541        | 0.0001                       | 0.0001 | 0.0001        | 0.3541   | 0.833 |
| 1000                        | 0.900 | 0.632 | 10000      | 0                               | 1424     | 8576     | 1.000    | 0.858       | 0.866       | 0.2293 | <b>0.1139</b> | 0.0001        | 0.0081        | 0.2081        | 0.0601        | 0.0011                       | 0.0401 | 0.3201        | 0.636    |       |
| 1000                        | 0.960 | 0.767 | 10000      | 0                               | 1430     | 8570     | 1.000    | 0.857       | 0.866       | 0.2593 | <b>0.0839</b> | 0.0001        | 0.0201        | 0.2561        | 0.0201        | 0.0011                       | 0.0401 | 0.3201        | 0.754    |       |
| 1000                        | 0.980 | 0.832 | 10000      | 0                               | 212      | 9788     | 1.000    | 0.979       | 0.979       | 0.2493 | <b>0.0939</b> | 0.0001        | 0.0201        | 0.2761        | 0.0201        | 0.0011                       | 0.0001 | 0.3601        | 0.828    |       |
| Cell (2,1)<br>creates<br>GZ | 50    | 0.960 | 0.639      | 9127                            | 873      | 385      | 9615     | 0.913       | 0.962       | 0.875  | 0.1901        | 0.0031        | 0.0001        | <b>0.2502</b> | 0.2501        | 0.0051                       | 0.0001 | 0.0001        | 0.3001   | 0.626 |
|                             | 50    | 0.980 | 0.756      | 7365                            | 2635     | 58       | 9942     | 0.737       | 0.994       | 0.756  | 0.2451        | 0.0001        | 0.0001        | <b>0.1862</b> | 0.2581        | 0.0001                       | 0.0001 | 0.0001        | 0.3101   | 0.727 |
|                             | 50    | 0.986 | 0.817      | 3999                            | 6001     | 80       | 9920     | 0.400       | 0.992       | 0.486  | 0.1600        | 0.0001        | 0.0001        | <b>0.1400</b> | 0.3500        | 0.0001                       | 0.0001 | 0.0001        | 0.3495   | 0.786 |
|                             | 100   | 0.930 | 0.639      | 9895                            | 105      | 168      | 9832     | 0.990       | 0.983       | 0.973  | 0.2361        | 0.0031        | 0.0001        | <b>0.1702</b> | 0.2051        | 0.0051                       | 0.0001 | 0.0801        | 0.3001   | 0.618 |
|                             | 100   | 0.965 | 0.744      | 8456                            | 1544     | 98       | 9902     | 0.846       | 0.990       | 0.845  | 0.2961        | 0.0031        | 0.0001        | <b>0.1102</b> | 0.2051        | 0.0051                       | 0.0001 | 0.0501        | 0.3301   | 0.749 |
|                             | 100   | 0.985 | 0.835      | 9308                            | 692      | 749      | 9251     | 0.931       | 0.925       | 0.856  | 0.2961        | 0.0001        | 0.0001        | <b>0.1102</b> | 0.2131        | 0.0001                       | 0.0001 | 0.0010        | 0.3801   | 0.834 |
|                             | 250   | 0.925 | 0.633      | 10000                           | 0        | 777      | 9223     | 1.000       | 0.922       | 0.925  | 0.2091        | 0.0081        | 0.0001        | <b>0.1971</b> | 0.2361        | 0.0201                       | 0.0001 | 0.0261        | 0.3041   | 0.632 |
|                             | 250   | 0.963 | 0.753      | 9973                            | 27       | 2148     | 7882     | 0.997       | 0.788       | 0.803  | 0.2091        | 0.0081        | 0.0001        | <b>0.1101</b> | 0.3231        | 0.0201                       | 0.0001 | 0.0261        | 0.3041   | 0.753 |
|                             | 250   | 0.977 | 0.838      | 10000                           | 0        | 3362     | 6638     | 1.000       | 0.664       | 0.705  | 0.2091        | 0.0001        | 0.0001        | <b>0.1101</b> | 0.3511        | 0.0001                       | 0.0001 | 0.0001        | 0.3301   | 0.834 |
|                             | 500   | 0.910 | 0.630      | 10000                           | 0        | 811      | 9189     | 1.000       | 0.919       | 0.922  | 0.2434        | 0.0221        | 0.0001        | <b>0.1468</b> | 0.1941        | 0.0361                       | 0.0041 | 0.0401        | 0.3141   | 0.631 |
|                             | 500   | 0.960 | 0.754      | 10000                           | 0        | 729      | 9271     | 1.000       | 0.927       | 0.930  | 0.2634        | 0.0021        | 0.0001        | <b>0.1268</b> | 0.2341        | 0.0161                       | 0.0041 | 0.0201        | 0.3341   | 0.750 |
|                             | 500   | 0.984 | 0.838      | 10000                           | 0        | 2287     | 7713     | 1.000       | 0.771       | 0.792  | 0.2794        | 0.0021        | 0.0001        | <b>0.1108</b> | 0.2541        | 0.0001                       | 0.0001 | 0.0001        | 0.3541   | 0.833 |
| 1000                        | 0.900 | 0.632 | 10000      | 0                               | 222      | 9778     | 1.000    | 0.978       | 0.978       | 0.2293 | 0.0281        | 0.0001        | <b>0.1139</b> | 0.2081        | 0.0601        | 0.0011                       | 0.0401 | 0.3201        | 0.637    |       |
| 1000                        | 0.960 | 0.767 | 10000      | 0                               | 1471     | 8529     | 1.000    | 0.853       | 0.862       | 0.2593 | 0.0201        | 0.0001        | <b>0.0839</b> | 0.2561        | 0.0201        | 0.0011                       | 0.0401 | 0.3201        | 0.753    |       |
| 1000                        | 0.980 | 0.832 | 10000      | 0                               | 215      | 9785     | 1.000    | 0.979       | 0.979       | 0.2493 | 0.0201        | 0.0001        | <b>0.0939</b> | 0.2761        | 0.0201        | 0.0011                       | 0.0001 | 0.3601        | 0.829    |       |
| Cell (2,3)<br>creates<br>GZ | 50    | 0.960 | 0.639      | 9379                            | 621      | 385      | 9615     | 0.938       | 0.962       | 0.900  | 0.1901        | 0.0031        | 0.0001        | 0.0051        | 0.2501        | <b>0.2402</b>                | 0.0001 | 0.0001        | 0.3101   | 0.625 |
|                             | 50    | 0.980 | 0.756      | 7400                            | 2600     | 58       | 9942     | 0.740       | 0.994       | 0.759  | 0.2451        | 0.0001        | 0.0001        | 0.0001        | 0.2581        | <b>0.1862</b>                | 0.0001 | 0.0001        | 0.3101   | 0.722 |
|                             | 50    | 0.986 | 0.817      | 4024                            | 5976     | 80       | 9920     | 0.402       | 0.992       | 0.488  | 0.1600        | 0.0001        | 0.0001        | 0.0001        | 0.3500        | <b>0.1400</b>                | 0.0001 | 0.0001        | 0.3495   | 0.778 |
|                             | 100   | 0.930 | 0.639      | 9903                            | 97       | 168      | 9832     | 0.990       | 0.983       | 0.974  | 0.2361        | 0.0701        | 0.0001        | 0.0051        | 0.2051        | <b>0.1702</b>                | 0.0001 | 0.0031        | 0.3101   | 0.629 |
|                             | 100   | 0.965 | 0.744      | 8357                            | 1643     | 98       | 9902     | 0.836       | 0.990       | 0.836  | 0.2961        | 0.0501        | 0.0001        | 0.0051        | 0.2051        | <b>0.1102</b>                | 0.0001 | 0.0031        | 0.3301   | 0.747 |
|                             | 100   | 0.985 | 0.835      | 9097                            | 903      | 749      | 9251     | 0.910       | 0.925       | 0.835  | 0.2961        | 0.0001        | 0.0001        | 0.0001        | 0.2131        | <b>0.1102</b>                | 0.0001 | 0.0010        | 0.3801   | 0.831 |
|                             | 250   | 0.925 | 0.633      | 10000                           | 0        | 771      | 9229     | 1.000       | 0.923       | 0.926  | 0.2091        | 0.0261        | 0.0001        | 0.0201        | 0.2361        | <b>0.1971</b>                | 0.0001 | 0.0081        | 0.3041   | 0.624 |
|                             | 250   | 0.963 | 0.753      | 9970                            | 30       | 2146     | 7854     | 0.997       | 0.785       | 0.801  | 0.2091        | 0.0081        | 0.0001        | 0.0201        | 0.3231        | <b>0.1101</b>                | 0.0001 | 0.0261        | 0.3041   | 0.750 |
|                             | 250   | 0.977 | 0.838      | 10000                           | 0        | 3389     | 6611     | 1.000       | 0.661       | 0.703  | 0.2091        | 0.0001        | 0.0001        | 0.0001        | 0.3511        | <b>0.1101</b>                | 0.0001 | 0.0001        | 0.3301   | 0.831 |
|                             | 500   | 0.910 | 0.630      | 10000                           | 0        | 831      | 9169     | 1.000       | 0.917       | 0.920  | 0.2434        | 0.0401        | 0.0001        | 0.0361        | 0.1941        | <b>0.1468</b>                | 0.0041 | 0.0221        | 0.3141   | 0.627 |
|                             | 500   | 0.960 | 0.754      | 10000                           | 0        | 774      | 9226     | 1.000       | 0.923       | 0.925  | 0.2634        | 0.0021        | 0.0001        | 0.0161        | 0.2341        | <b>0.1268</b>                | 0.0041 | 0.0201        | 0.3341   | 0.747 |
|                             | 500   | 0.984 | 0.838      | 10000                           | 0        | 2331     | 7669     | 1.000       | 0.767       | 0.789  | 0.2794        | 0.0021        | 0.0001        | 0.0001        | 0.2541        | <b>0.1108</b>                | 0.0001 | 0.0001        | 0.3541   | 0.831 |
| 1000                        | 0.900 | 0.632 | 10000      | 0                               | 269      | 9731     | 1.000    | 0.973       | 0.973       | 0.2293 | 0.0401        | 0.0001        | 0.0601        | 0.2081        | <b>0.1139</b> | 0.0011                       | 0.0281 | 0.3201        | 0.635    |       |
| 1000                        | 0.960 | 0.767 | 10000      | 0                               | 1509     | 8491     | 1.000    | 0.849       | 0.859       | 0.2593 | 0.0201        | 0.0001        | 0.0201        | 0.2561        | <b>0.0839</b> | 0.0011                       | 0.0401 | 0.3201        | 0.753    |       |
| 1000                        | 0.980 | 0.832 | 10000      | 0                               | 229      | 9771     | 1.000    | 0.977       | 0.977       | 0.2493 | 0.0201        | 0.0001        | 0.0201        | 0.2761        | <b>0.0939</b> | 0.0011                       | 0.0001 | 0.3601        | 0.827    |       |
| Cell (3,2)<br>creates<br>GZ | 50    | 0.960 | 0.639      | 9349                            | 651      | 385      | 9615     | 0.935       | 0.962       | 0.897  | 0.1901        | 0.0031        | 0.0001        | 0.0051        | 0.2501        | 0.0001                       | 0.0001 | <b>0.2402</b> | 0.3101   | 0.625 |
|                             | 50    | 0.980 | 0.756      | 7292                            | 2708     | 58       | 9942     | 0.729       | 0.994       | 0.750  | 0.2451        | 0.0001        | 0.0001        | 0.0001        | 0.2581        | 0.0001                       | 0.0001 | <b>0.1862</b> | 0.3101   | 0.722 |
|                             | 50    | 0.986 | 0.817      | 3897                            | 6103     | 80       | 9920     | 0.390       | 0.992       | 0.478  | 0.1600        | 0.0001        | 0.0001        | 0.0001        | 0.3500        | 0.0001                       | 0.0001 | <b>0.1400</b> | 0.3495   | 0.778 |
|                             | 100   | 0.930 | 0.639      | 9893                            | 107      | 168      | 9832     | 0.989       | 0.983       | 0.973  | 0.2361        | 0.0701        | 0.0001        | 0.0051        | 0.2051        | 0.0031                       | 0.0001 | <b>0.1702</b> | 0.3101   | 0.635 |
|                             | 100   | 0.965 | 0.744      | 8373                            | 1627     | 98       | 9902     | 0.837       | 0.990       | 0.837  | 0.2961        | 0.0501        | 0.0001        | 0.0051        | 0.2051        | 0.0031                       | 0.0001 | <b>0.1102</b> | 0.3301   | 0.749 |
|                             | 100   | 0.985 | 0.835      | 9021                            | 979      | 749      | 9251     | 0.902       | 0.925       | 0.827  | 0.2961        | 0.0001        | 0.0001        | 0.0001        | 0.2131        | 0.0010                       | 0.0001 | <b>0.1102</b> | 0.3801   | 0.831 |
|                             | 250   | 0.925 | 0.633      | 10000                           | 0        | 792      | 9208     | 1.000       | 0.921       | 0.924  | 0.2091        | 0.0261        | 0.0001        | 0.0201        | 0.2361        | 0.0081                       | 0.0001 | <b>0.1971</b> | 0.3041   | 0.625 |
|                             | 250   | 0.963 | 0.753      | 9970                            | 30       | 2097     | 7903     | 0.997       | 0.790       | 0.805  | 0.2091        | 0.0081        | 0.0001        | 0.0201        | 0.3231        | 0.0261                       | 0.0001 | <b>0.1101</b> | 0.3041   | 0.750 |
|                             | 250   | 0.977 | 0.838      | 10000                           | 0        | 3334     | 6666     | 1.000       | 0.667       | 0.707  | 0.2091        | 0.0001        | 0.0001        | 0.0001        | 0.3511        | 0.0001                       | 0.0001 | <b>0.1101</b> | 0.3301   | 0.831 |
|                             | 500   | 0.910 | 0.630      | 10000                           | 0        | 782      | 9218     | 1.000       | 0.922       | 0.925  | 0.2434        | 0.0401        | 0.0001        | 0.0361        | 0.1941        | 0.0221                       | 0.0041 | <b>0.1468</b> | 0.3141   | 0.628 |
|                             | 500   | 0.960 | 0.754      | 10000                           | 0        | 786      | 9214     | 1.000       | 0.921       | 0.924  | 0.2634        | 0.0021        | 0.0001        | 0.0161        | 0.2341        | 0.0201                       | 0.0041 | <b>0.1268</b> | 0.3341   | 0.748 |
|                             | 500   | 0.984 | 0.838      | 10000                           | 0        | 2314     | 7686     | 1.000       | 0.769       | 0.790  | 0.2794        | 0.0021        | 0.0001        | 0.0001        | 0.2541        | 0.0001                       | 0.0001 | <b>0.1108</b> | 0.3541</ |       |

**Table S3** Sample size, correlation coefficient, true kappa, counts of true and false classifications, accuracy measures, cell probabilities used to inject grey zone and the corresponding kappa after injecting a grey zone in the table for 4x4 agreement tables.

| Case                     | n                        | rho                      | True kappa               | GZ+ TGZ+                 | GZ- TGZ+                 | GZ+ TGZ- | GZ- TGZ- | Sensitivity | Specificity | MCC   | Cell probabilities to create GZ |        |        |        |        |        |        |        |        |        |        |        |        |        |        |        | Corresponding Kappa under GZ |        |        |        |        |       |
|--------------------------|--------------------------|--------------------------|--------------------------|--------------------------|--------------------------|----------|----------|-------------|-------------|-------|---------------------------------|--------|--------|--------|--------|--------|--------|--------|--------|--------|--------|--------|--------|--------|--------|--------|------------------------------|--------|--------|--------|--------|-------|
|                          |                          |                          |                          |                          |                          |          |          |             |             |       | (1,1)                           | (1,2)  | (1,3)  | (1,4)  | (2,1)  | (2,2)  | (2,3)  | (2,4)  | (3,1)  | (3,2)  | (3,3)  | (3,4)  | (4,1)  | (4,2)  | (4,3)  | (4,4)  |                              |        |        |        |        |       |
| Cell (1,2)<br>creates GZ | 50                       | 0.911                    | 0.624                    | 3958                     | 6042                     | 72       | 9928     | 0.396       | 0.993       | 0.484 | 0.1354                          | 0.1678 | 0.0005 | 0.0001 | 0.0051 | 0.1431 | 0.0211 | 0.0021 | 0.0021 | 0.0531 | 0.1671 | 0.0181 | 0.0001 | 0.0001 | 0.0151 | 0.2691 | 0.626                        |        |        |        |        |       |
|                          | Cell (2,1)<br>creates GZ | 50                       | 0.911                    | 0.624                    | 3929                     | 6071     | 72       | 9928        | 0.393       | 0.993 | 0.482                           | 0.1354 | 0.0051 | 0.0005 | 0.0001 | 0.1678 | 0.1431 | 0.0211 | 0.0021 | 0.0021 | 0.0531 | 0.1671 | 0.0181 | 0.0001 | 0.0001 | 0.0151 | 0.2691                       | 0.626  |        |        |        |       |
|                          |                          | Cell (2,3)<br>creates GZ | 50                       | 0.911                    | 0.624                    | 746      | 9254     | 72          | 9928        | 0.075 | 0.993                           | 0.170  | 0.1354 | 0.0051 | 0.0005 | 0.0001 | 0.0211 | 0.1431 | 0.1678 | 0.0021 | 0.0021 | 0.0531 | 0.1671 | 0.0181 | 0.0001 | 0.0001 | 0.0151                       | 0.2691 | 0.626  |        |        |       |
|                          |                          |                          | Cell (3,2)<br>creates GZ | 50                       | 0.911                    | 0.624    | 719      | 9281        | 72          | 9928  | 0.072                           | 0.993  | 0.166  | 0.1354 | 0.0051 | 0.0005 | 0.0001 | 0.0211 | 0.1431 | 0.0531 | 0.0021 | 0.0021 | 0.1678 | 0.1671 | 0.0181 | 0.0001 | 0.0001                       | 0.0151 | 0.2691 | 0.626  |        |       |
|                          |                          |                          |                          | Cell (3,4)<br>creates GZ | 50                       | 0.911    | 0.624    | 2590        | 7410        | 72    | 9928                            | 0.259  | 0.993  | 0.371  | 0.1354 | 0.0051 | 0.0005 | 0.0001 | 0.0211 | 0.1431 | 0.0531 | 0.0021 | 0.0021 | 0.0181 | 0.1671 | 0.1678 | 0.0001                       | 0.0001 | 0.0151 | 0.2691 | 0.626  |       |
|                          |                          |                          |                          |                          | Cell (4,3)<br>creates GZ | 50       | 0.911    | 0.624       | 2617        | 7383  | 72                              | 9928   | 0.262  | 0.993  | 0.373  | 0.1354 | 0.0051 | 0.0005 | 0.0001 | 0.0211 | 0.1431 | 0.0531 | 0.0021 | 0.0021 | 0.0181 | 0.1671 | 0.0151                       | 0.0001 | 0.0001 | 0.0151 | 0.2691 | 0.626 |

# Supplementary Codes

## Implementation

The following function computes the criterion  $\Delta$  and the threshold  $\tau_{\Delta}$  for the detection of grey zones in an input agreement table.

```
detectGreyZone <- function(table){
  require(irrCAC)
  R <- nrow(table)
  if (ncol(table) != R){
    stop("This function requires a square contingency table.")
  }
  n <- sum(table)

  #----- Inter-Rater Agreement -----
  kappa <- kappa2.table(table)
  kappa.linear <- kappa2.table(table, weights = linear.weights(1:R))
  kappa.quadratic <- kappa2.table(table, weights = quadratic.weights(1:R))
  AC2.linear <- gwet.ac1.table(table, weights = linear.weights(1:R))
  AC2.quadratic <- gwet.ac1.table(table, weights = quadratic.weights(1:R))
  BP.linear <- bp2.table(table, weights = linear.weights(1:R))
  BP.quadratic <- bp2.table(table, weights = quadratic.weights(1:R))

  #----- Criterion -----
  expf <- array(0,dim=c(R,R))
  st.res <- array(0,dim=c(R,R))

  for (j in 1:R){
    for (k in 1:R){
      expf[j,k] = (table[j,k]+table[k,j])/2
      st.res[j,k] = (table[j,k]-expf[j,k])/sqrt(expf[j,k])
    }
  }
  st.res[st.res=="NaN"] <- 0

  delta <- st.res/kappa$coeff.val
  delta2 <- max(delta)

  #----- Threshold -----
  tau_Delta <- (-0.0080+0.4090*kappa$coeff.val^2)+3.331*10^{-5}*n
  -2.467*10^{-8}*n^2)^{-0.6266}

  #----- Result -----
  if (delta2 > tau_Delta){# Grey zone detected, report AC2 and BP with quadratic weights.
    agreement <- data.frame(Weights = c("Quadratic"),
                             AC2 = AC2.quadratic$coeff.val,
                             BP = BP.quadratic$coeff.val)
  } else { # No grey zone detected, report kappa, AC2 and BP with linear and quadratic weights.
```

```

agreement <- data.frame(Weights=c("Linear","Quadratic"),
                          Kappa=c(kappa.linear$coeff.val,kappa.quadratic$coeff.val),
                          AC2=c(AC2.linear$coeff.val,AC2.quadratic$coeff.val),
                          BP=c(BP.linear$coeff.val,BP.quadratic$coeff.val))
}

return(list(delta = delta, Delta = delta2, tau_Delta = tau_Delta,
            result = ifelse(delta2 > tau_Delta, "There is a grey zone.",
                            "There is not a grey zone."),
          agreement = agreement))
}

```

## Examples

The following examples demonstrate the use of `detectGreyZone()` function.

### Assessment of torture allegations data

```

data <- matrix(c(36,0,0,0,
                7,57,11,0,
                0,23,34,4,
                0,1,19,10), nrow = 4, ncol = 4, byrow = TRUE)

```

```
detectGreyZone(data)
```

```

## Loading required package: irrCAC
## $delta
##      [,1]      [,2]      [,3]      [,4]
## [1,] 0.000000 -3.432727  0.000000  0.000000
## [2,] 3.432727  0.000000 -2.670128 -1.297449
## [3,] 0.000000  2.670128  0.000000 -4.058052
## [4,] 0.000000  1.297449  4.058052  0.000000
##
## $Delta
## [1] 4.058052
##
## $tau_Delta
## [1] 3.791366
##
## $result
## [1] "There is a grey zone."
##
## $agreement
##      Weights      AC2      BP
## 1 Quadratic 0.8834948 0.8653465

```

```

data2 <- matrix(c(9,32,8,1,0,
                 12,178,43,7,0,
                 1,42,61,25,0,

```

```
0,1,10,17,2,  
0,0,0,4,58), nrow = 5, ncol = 5, byrow = TRUE)
```

```
detectGreyZone(data2)
```

#### Assessment of PI-RADS v2.1 scores data

```
## $delta  
##      [,1]      [,2]      [,3]      [,4]      [,5]  
## [1,] 0.000000 4.6250711 3.5792459 1.533963 0.000000  
## [2,] -4.625071 0.0000000 0.1663816 3.254026 0.000000  
## [3,] -3.579246 -0.1663816 0.0000000 3.889305 0.000000  
## [4,] -1.533963 -3.2540259 -3.8893049 0.000000 -1.252475  
## [5,] 0.000000 0.0000000 0.0000000 1.252475 0.000000  
##  
## $Delta  
## [1] 4.625071  
##  
## $tau_Delta  
## [1] 4.537567  
##  
## $result  
## [1] "There is a grey zone."  
##  
## $agreement  
##      Weights      AC2      BP  
## 1 Quadratic 0.9164416 0.8791585
```
